# Supplementary material
Source: ML conference proceedings conference paper supplement (https://openreview.net/forum?id=UDbEpJojik)
Supplement: supplementary_material [file attachment]

## Sheet: tab1_cifar10
arch	test all acc	FaCe
resnet50	97.59	1.42084
resnet101	97.99	1.90681
resnet152	98.06	1.98547
densenet121	97.24	0.627172
densenet169	97.45	0.782798
densenet201	97.49	1.04943
mobilenetv1	95.37	0.651936
mobilenetv2	95.03	0.289697
mobilenetv3_large	96	0.82893
efficientnetb0	97.13	1.38219
efficientnetb1	97.44	1.56611
efficientnetb2	97.68	1.70362
efficientnetb3	98.22	1.98263
vgg16	94.72	0.0755877
vgg19	94.81	0.088813

## Sheet: tab1_pets
arch	test all acc	FaCe
resnet50	96.146	1.73164
resnet101	96.552	1.83559
resnet152	96.619	1.81118
densenet121	94.929	0.688633
densenet169	94.929	1.34987
densenet201	95.132	1.35171
mobilenetv1	92.224	0.9606
mobilenetv2	90.805	0
mobilenetv3_large	90.128	0.485076
efficientnetb0	93.78	1.64957
efficientnetb1	94.659	1.83308
efficientnetb2	94.659	1.88658
efficientnetb3	94.997	1.99822
vgg16	91.751	1.65015
vgg19	92.089	1.68743

## Sheet: tab1_cifar100
arch	test all acc	FaCe
resnet50	86.02	1.29231
resnet101	88.23	1.83696
resnet152	88.66	1.99783
densenet121	85.26	0.497231
densenet169	86.34	0.833017
densenet201	86.73	0.973996
mobilenetv1	80.36	0.697664
mobilenetv2	79.27	0.175515
mobilenetv3_large	81.57	0.732816
efficientnetb0	85.52	1.20178
efficientnetb1	86.45	1.45074
efficientnetb2	87.03	1.57139
efficientnetb3	88.37	1.94077
vgg16	76.54	0.336672
vgg19	77.74	0.354686

## Sheet: tab1_CUB
arch	test all acc	FaCe
resnet50	80.342	1.5982
resnet101	80.445	1.87112
resnet152	81.222	1.76003
densenet121	78.702	0.344026
densenet169	79.358	0.704299
densenet201	80.307	1.02879
mobilenetv1	71.954	1.04314
mobilenetv2	70.953	0.295399
mobilenetv3_large	63.117	0.898932
efficientnetb0	76.32	1.72504
efficientnetb1	77.511	1.69771
efficientnetb2	78.064	1.81278
efficientnetb3	77.511	1.80784
vgg16	70.728	1.33198
vgg19	71.022	1.042

## Sheet: tab1_DTD
arch	test all acc	FaCe
resnet50	69.392	1.85978
resnet101	68.83	1.99691
resnet152	69.468	1.98451
densenet121	63.191	0.917917
densenet169	63.564	1.28338
densenet201	63.457	1.303
mobilenetv1	62.394	1.18388
mobilenetv2	61.755	0.577687
mobilenetv3_large	55.851	0.974997
efficientnetb0	61.17	1.36266
efficientnetb1	62.128	1.45843
efficientnetb2	63.777	0.911211
efficientnetb3	62.926	1.79133
vgg16	58.085	0.43107
vgg19	57.766	0.631429

## Sheet: tab1_GTSRB
arch	test all acc	FaCe
resnet50	96.089	1.32101
resnet101	96.556	0.946496
resnet152	96.279	0.669275
densenet121	97.641	0.862767
densenet169	97.205	1.59196
densenet201	97.023	1.95134
mobilenetv1	96.128	1.37116
mobilenetv2	96.176	1.41942
mobilenetv3_large	94.98	1.7663
efficientnetb0	96.69	1.74008
efficientnetb1	96.207	1.6575
efficientnetb2	96.58	1.45487
efficientnetb3	96.532	1.54608
vgg16	95.748	0.0559185
vgg19	96.96	0.104428

## Sheet: tab1_STL-10
arch	test all acc	FaCe
resnet50	98.037	1.73164
resnet101	98.575	1.83559
resnet152	98.888	1.81118
densenet121	95.925	0.688633
densenet169	95.975	1.34987
densenet201	96.35	1.35171
mobilenetv1	93.812	0.9606
mobilenetv2	92.412	0
mobilenetv3_large	94.4	0.485076
efficientnetb0	97.3	1.64957
efficientnetb1	97.625	1.83308
efficientnetb2	97.812	1.88658
efficientnetb3	98.213	1.99822
vgg16	94.825	1.65015
vgg19	95.138	1.68743

## Sheet: tab6-food101
arch	test all acc	FaCe
resnet50	84.034	1.91357
resnet101	88.131	1.96548
resnet152	88.634	1.94483
densenet121	86.044	0.932235
densenet169	86.055	1.39528
densenet201	87.05	1.25537
mobilenetv1	83.18	0.921159
mobilenetv2	82.701	0
mobilenetv3_large	82.44	0.409134
efficientnetb0	86.198	1.36941
efficientnetb1	86.321	1.21413
efficientnetb2	86.78	1.77664
efficientnetb3	86.63	1.1535
vgg16	80.669	0.582072
vgg19	80.844	0.809886

## Sheet: tab2-stl-10
arch	source	test acc	face
resnet50	CIFAR10	91.425	1.59404
resnet50	CIFAR100	89.85	1.31712
resnet50	Caltech-UCSD birds 2011	95.162	1.91026
resnet50	Oxford flowers 102	95.325	1.98222
resnet50	StanfordCars	93.925	1.67829
resnet50	country211	92.075	0.893454
resnet50	food101	88.825	1.49783
resnet50	SVHN	81.475	0
resnet50	FGVCAircraft	94.037	1.37716
resnet50	GTSRB	92.7	1.01709
densenet121	CIFAR10	92.162	1.78823
densenet121	CIFAR100	90.375	1.04435
densenet121	Caltech-UCSD birds 2011	94.05	1.4644
densenet121	Oxford flowers 102	95.175	1.58368
densenet121	StanfordCars	94.062	1.49668
densenet121	country211	88.8	1.12808
densenet121	food101	89.675	1.05375
densenet121	SVHN	80.8	0.406183
densenet121	FGVCAircraft	93.112	1.34787
densenet121	GTSRB	92.112	0.95935
efficientnetb2	CIFAR10	96.475	2
efficientnetb2	CIFAR100	96.2	1.7503
efficientnetb2	Caltech-UCSD birds 2011	96.237	1.91201
efficientnetb2	Oxford flowers 102	97.577	1.91926
efficientnetb2	StanfordCars	95.575	1.56669
efficientnetb2	country211	93.925	1.80539
efficientnetb2	food101	95.188	1.47201
efficientnetb2	SVHN	94.662	1.33823
efficientnetb2	FGVCAircraft	95.862	1.59378
efficientnetb2	GTSRB	92.763	1.11231

## Sheet: tab2-pets
arch	source	target	test acc	face
resnet50	CIFAR10	oxfordpets	87.627	0.755869
resnet50	CIFAR100	oxfordpets	86.139	0.611817
resnet50	Caltech-UCSD birds 2011	oxfordpets	93.78	1.88489
resnet50	Oxford flowers 102	oxfordpets	94.659	1.94501
resnet50	StanfordCars	oxfordpets	93.577	1.68845
resnet50	country211	oxfordpets	91.346	0.744738
resnet50	food101	oxfordpets	87.897	1.21164
resnet50	SVHN	oxfordpets	73.225	0.776356
resnet50	FGVCAircraft	oxfordpets	93.644	1.12839
resnet50	GTSRB	oxfordpets	92.63	0.78432
densenet121	CIFAR10	oxfordpets	85.869	0.617047
densenet121	CIFAR100	oxfordpets	83.976	0.817085
densenet121	Caltech-UCSD birds 2011	oxfordpets	92.292	1.61501
densenet121	Oxford flowers 102	oxfordpets	93.847	1.51902
densenet121	StanfordCars	oxfordpets	92.63	1.44509
densenet121	country211	oxfordpets	86.41	0.887922
densenet121	food101	oxfordpets	86.815	1.01421
densenet121	SVHN	oxfordpets	68.289	0.583388
densenet121	FGVCAircraft	oxfordpets	90.805	0.959366
densenet121	GTSRB	oxfordpets	90.534	0.879695
efficientnetb2	CIFAR10	oxfordpets	92.089	1.24781
efficientnetb2	CIFAR100	oxfordpets	91.346	1.13062
efficientnetb2	Caltech-UCSD birds 2011	oxfordpets	93.577	1.99856
efficientnetb2	Oxford flowers 102	oxfordpets	93.982	1.97878
efficientnetb2	StanfordCars	oxfordpets	92.765	1.763
efficientnetb2	country211	oxfordpets	90.805	1.67447
efficientnetb2	food101	oxfordpets	92.63	1.36446
efficientnetb2	SVHN	oxfordpets	91.819	1.02827
efficientnetb2	FGVCAircraft	oxfordpets	93.103	1.53472
efficientnetb2	GTSRB	oxfordpets	89.52	0.751957

[truncated: 12 more sheets: tab2-DTD, tab7-cifar10, tab7-cifar100, tab7-gtsrb, tab7-cub, tab3-cifar100, tab3-stl-10, tab3-dtd, tab8-cifar10, tab8-pet, tab8-cub, tab8-gtsrb]
